# Supplementary material
Source: MDPI journal article supplement (https://www.mdpi.com/2073-4441/12/1/275)

# Phosphorus Removal and Carbon Dioxide Capture in a Pilot Conventional Septic System Upgraded with a Sidestream Steel Slag Filter

Dominique Claveau-Mallet, Hatim Seltani and Yves Comeau

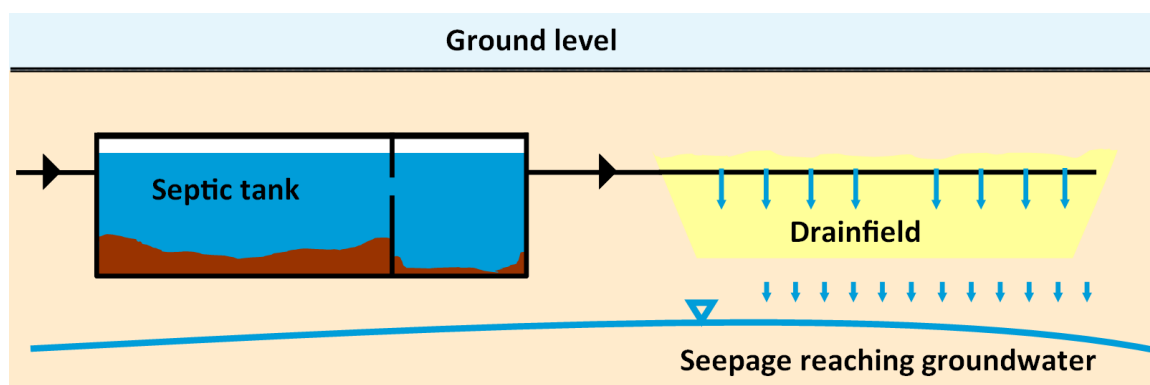

**Figure S1.** Schematic of a conventional septic system used in decentralized domestic wastewater treatment.

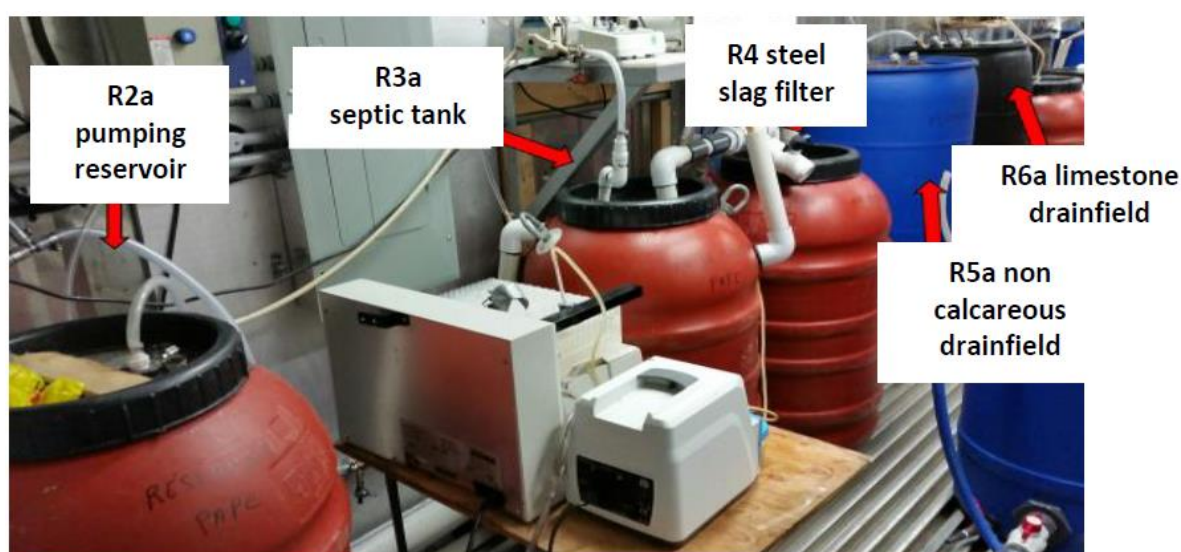

**Figure S2.** Picture of the septic system with slag filter.

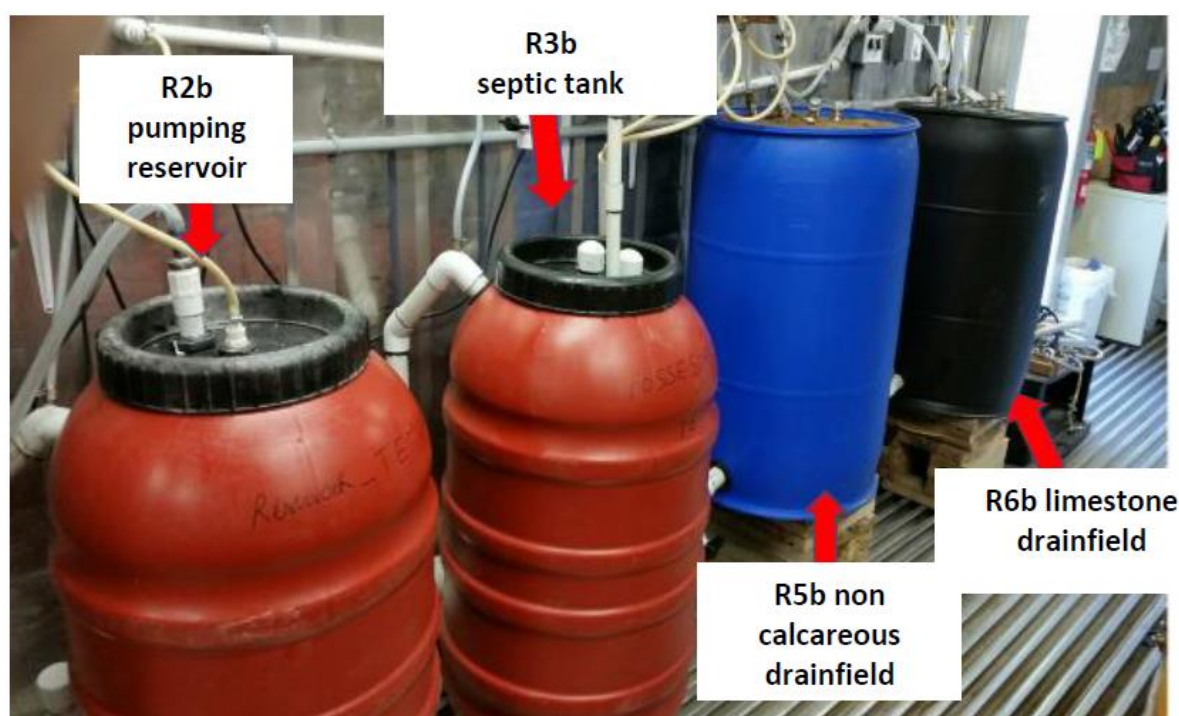

**Figure S3.** Picture of the control septic system.

**Table S1.** Heavy metals concentrations in a leaching test using a 35-g 5–10 mm slag sample in 700 mL of distilled water, shaken for 24 h.

| Component | Concentration (mg/L) |
|-----------|----------------------|
| Fe        | 0.04                 |
| Mn        | <0.01                |
| Zn        | <0.001               |
| Cu        | <0.01                |
| Cd        | <0.01                |
| Pb        | <0.01                |
| Ni        | <0.01                |
| Ag        | 0.009                |
| Ca        | 50.8                 |
| Al        | 1.37                 |

**Table S2.** Drainfield sand properties.

| Parameter         | Units | Non-calcareous Sand | Limestone Sand |
|-------------------|-------|---------------------|----------------|
| D <sub>10</sub>   | mm    | 0.5                 | 0.55           |
| C <sub>u</sub>    | -     | 2.0                 | 3.1            |
| Fraction < 80 µm  | %     | 0.58                | 0.16           |
| Fraction > 2.5 mm | %     | 1.4                 | 8.4            |

D<sub>10</sub>: sieve mesh that lets 10% of soil particles pass through the mesh. C<sub>u</sub>: uniformity coefficient, defined as D<sub>60</sub>/D<sub>10</sub>. D<sub>60</sub>: sieve mesh that lets 60% of soil particles pass through the mesh.

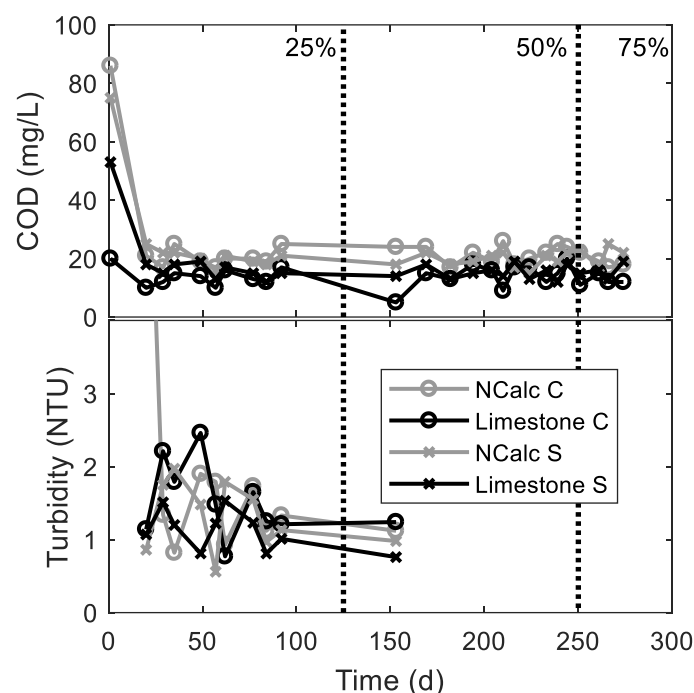

**Figure S4.** Chemical oxygen demand (COD) and turbidity monitoring at the effluent of drainfields following septic tanks without (C) or with (S) slag filter. Recirculation ratios are indicated at the top of the Figure and delineated by vertical lines.

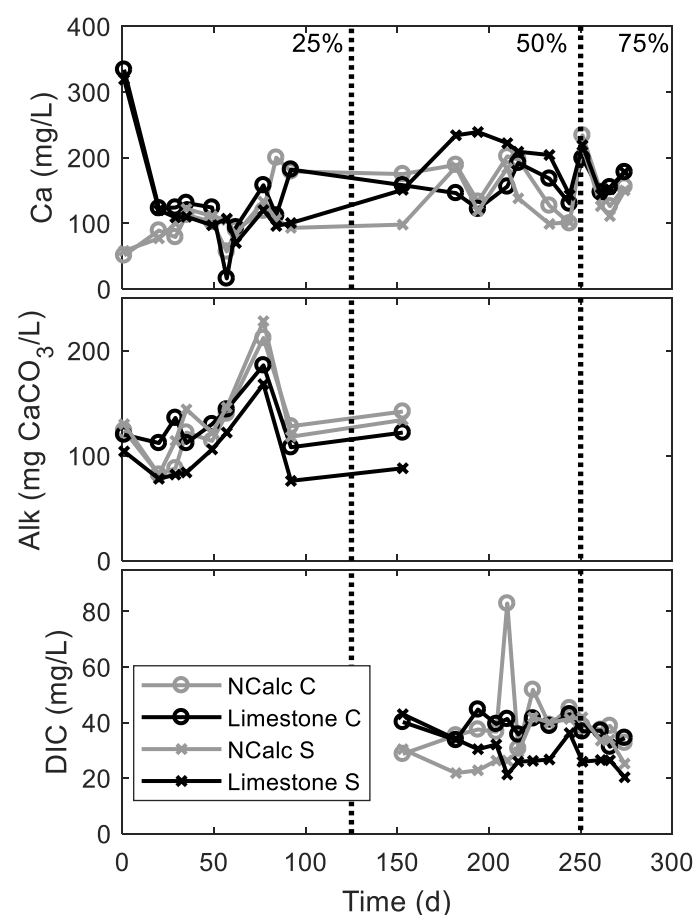

**Figure S5.** Calcium, alkalinity and dissolved inorganic carbon (DIC) in the effluent of drainfields following septic tanks without (C) or with (S) slag filter. Recirculation ratios are indicated at the top of the Figure and delineated by vertical lines.

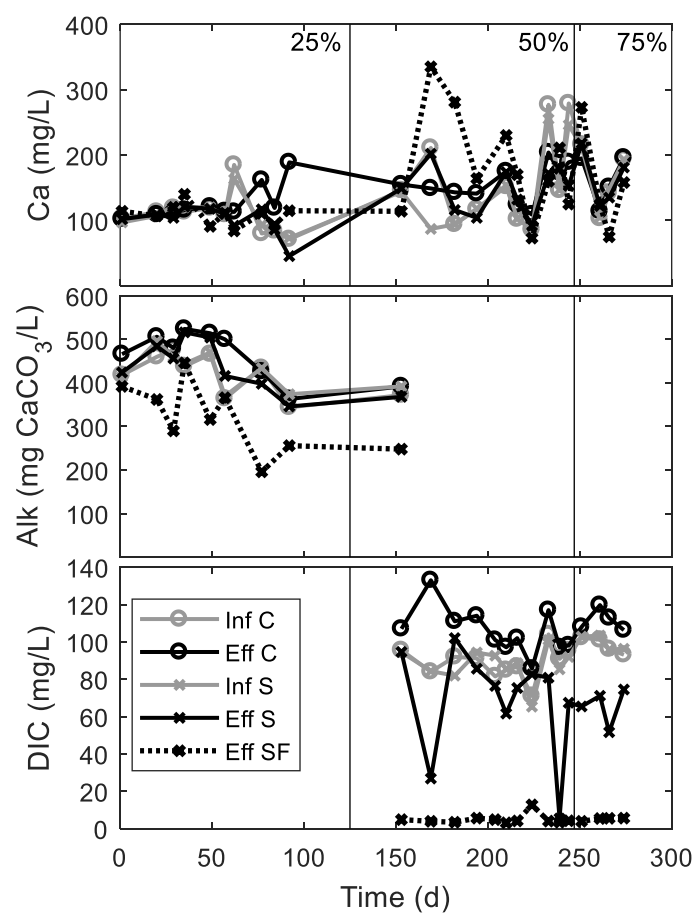

**Figure S6.** Calcium, alkalinity and dissolved inorganic carbon (DIC) monitoring in septic tanks without (C) or with (S) slag filter. Inf: influent, Eff: effluent; SF: slag filter. Recirculation ratios are indicated at the top of the Figure and delineated by vertical lines.

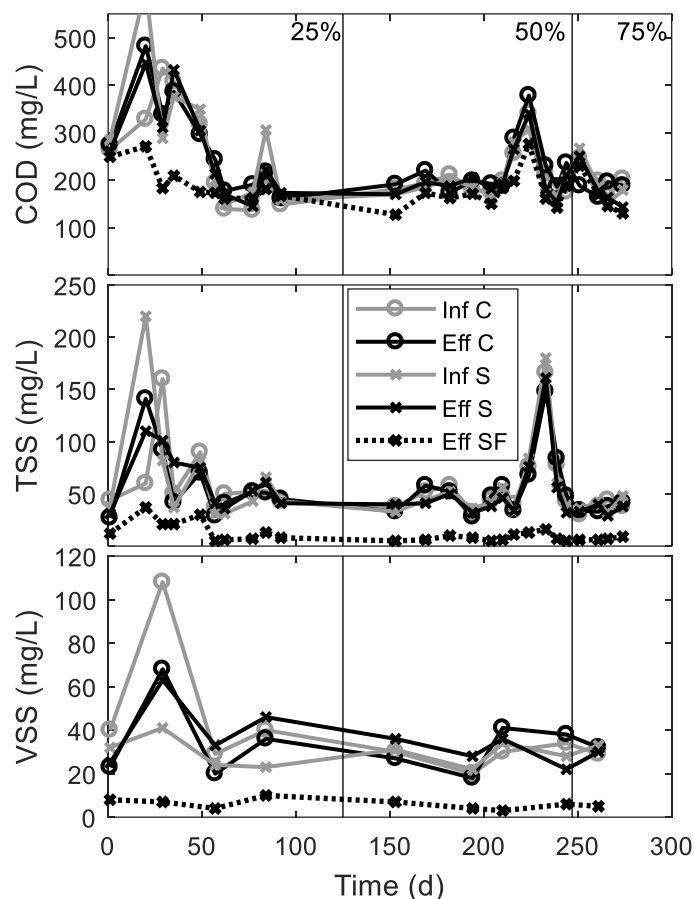

**Figure S7.** Chemical oxygen demand (COD), total suspended solids (TSS) and volatile suspended solids (VSS) monitoring in septic tanks without (C) or with (S) slag filter. Inf: influent, Eff: effluent; SF: slag filter. Recirculation ratios are indicated at the top of the Figure and delineated by vertical lines.

**Table S3.** Calibration of the septic tank effluent and the slag filter effluent (mean values in the 50 and 75% recirculation ratio periods).

| Parameter         |        | Septic Tank Influent |      | Slag Filter Effluent |       |
|-------------------|--------|----------------------|------|----------------------|-------|
|                   |        | Exp                  | Sim  | Exp                  | Sim   |
| pH                | -      | 7.24                 | 7.24 | 11.22                | 11.22 |
| o-PO <sub>4</sub> | mg P/L | 3.25                 | 3.25 | 0.07                 | 0.02  |
| Ca                | mg/L   | 165                  | 165  | 196                  | 223   |
| DIC               | mg/L   | 100                  | 100  | 4.9                  | 2.1   |

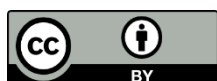

Supplement: s1 [file s1]
